# Supplementary material for: Polyphenols and IUGR Pregnancies: Effects of Maternal Hydroxytyrosol Supplementation on Postnatal Growth, Metabolism and Body Composition of the Offspring
Source: Antioxidants (Basel). 2019 Nov 8;8(11):535. doi: 10.3390/antiox8110535 (PMC6912388; doi:10.3390/antiox8110535)
Supplement: Supplementary file 1 [file antioxidants-08-00535-s001.xlsx]

## Sheet: ST1
Table S1. The composition of diets (g/kg, dry-matter basis).
	Sow			Offspring
	C	HT		Starter	Growth
Phase	Gestation & Lactation			26-60 days-old	60-180 days-old
Estimated analysis
Dry Matter (DM)	899.3	898.9		896.4	897.3
Crude protein	118	118		180	120
Crude fat	31.2	31.2		56	35
Crude fiber	60.3	60.3		31.1	55.1
Nitrogen-free extracts (NFE)1	632.1	631.7		583.6	630.8
Ash	57.7	57.7		45.7	56.4
Fatty acids composition (g/100 g total FA)
C14:0	0.658701	0.643443		0.759668	0.571663
C14:1	0.146481	0.0914751		0.247788	0.184132
C16:0	20.9321	21.8038		17.7471	18.4906
C16:1 n-9	0.3492	0.0814606		0.214533	0.211835
C16:1 n-7	0.917995	0.772953		1.10764	0.83912
C17:0	0.39205	0.367242		0.353369	0.428054
C17:1	0.184451	0		0.15362	0
C18:0	3.87957	3.79153		5.87008	3.49294
C18:1 n-9	19.3812	19.4646		24.1259	19.9144
C18:1 n-7	3.9424	3.90718		4.23895	3.99179
C18:2 n-6	42.8733	41.7503		38.6348	44.4548
C18:3 n-3	3.73109	3.6926		4.28109	3.35074
C20:0	0.323392	0.368694		0.339388	0.38538
C20:1 n-9	0.803957	0.781768		0.573443	0.798304
C20:2	0.207165	0.187993		0.194886	0
C20:5 n-3	0.143282	0.166534		0.21694	0.188196
C22:4 n-6	0.110287	0.0905508		0.184269	0.298015
C22:5 n-3	0.360447	0.77628		0.43299	0.997368
C22:6 n-3	0.662892	1.26157		0.323537	1.4026
SFA	26.1858	26.9747		25.0696	23.3687
MUFA	25.7257	25.0995		30.6618	25.9396
PUFA	47.8813	47.7378		44.0736	50.6917
1According to De Blas, et al. [14] (g/kg of diet). NFE= DM −( ash + crude protein + crude fat + crude fiber).
FA= Fatty acids, SFA = saturated FA, MUFA = monounsaturated FA, PUFA = polyunsaturated FA.
C= Control, HT= Treated with hydroxytyrosol

## Sheet: ST2
Table S2. Metabolic parameters by treatment.
Age	Variables	N	Treatment
			C				HT				P-value
120 days-old	Glucose (mg/dl)	39	101.8	±	13.1333		101.316	±	14.103		ns
	Fructosamine (µmol/l)	39	267.192	±	29.7303		272.29	±	33.8419		ns
	Cholesterol (mg/dl)	39	109.265	±	14.3453		108.747	±	19.8406		ns
	HDL-c (mg/dl)	39	52.285	±	6.82467		50.7263	±	11.1527		ns
	LDL-c (mg/dl)	39	51.7434	±	13.7642		51.5188	±	16.2751		ns
	Triglycerides (mg/dl)	39	62.75	±	23.2761		73.8421	±	42.4595		ns
150 days-old	Glucose (mg/dl)	39	104.9	±	20.6165		95.6842	±	10.5675		ns
	Fructosamine (µmol/l)	39	258.037	±	27.6935		265.502	±	27.9492		0.0348
	Cholesterol (mg/dl)	39	109.1	±	19.0173		116.247	±	17.9142		ns
	HDL-c (mg/dl)	39	49.75	±	7.47582		52.6263	±	10.3549		ns
	LDL-c (mg/dl)	39	53.9733	±	20.8195		60.3768	±	22.3643		ns
	Triglycerides (mg/dl)	39	60.6	±	33.934		63.2632	±	35.4508		ns
180 days-old	Glucose (mg/dl)	39	104.875	±	13.8601		102.368	±	24.0583		ns
	Fructosamine (µmol/l)	39	264.309	±	36.1584		267.296	±	24.5613		ns
	Cholesterol (mg/dl)	39	109.67	±	27.1958		107.568	±	26.435		ns
	HDL-c (mg/dl)	39	47.53	±	9.63978		44.7684	±	7.73305		ns
	LDL-c (mg/dl)	39	57.2467	±	16.1485		62.4338	±	19.7927		ns
	Triglycerides (mg/dl)	39	63.05	±	25.2138		50.9211	±	26.671		ns
HDL-c= high-density lipoprotein cholesterol, HDL-LDL-c=low-density lipoprotein cholesterol
C= Control, HT= Treated with hydroxytyrosol

## Sheet: ST3
Table S3. Relative weights to body weight (%) at 180 days-old by treatment.
Organ	N	Treatment
		C				HT				P-value
Carcass	39	70.5306	±	2.1149		70.7701	±	2.87531		ns
Viscerae	39	18.2025	±	2.07316		17.4591	±	2.33599		ns
Adrenal glands	39	0.0097615	±	0.0013452		0.009358	±	0.0018645		ns
Brain	39	0.217754	±	0.0300711		0.219153	±	0.0417022		ns
Heart	39	0.431102	±	0.0595702		0.444963	±	0.0378109		ns
Intestine	39	10.9423	±	1.81721		9.81547	±	1.53516		ns
Kidneys	39	0.349444	±	0.0435713		0.340348	±	0.0217124		ns
Liver	39	2.0778	±	0.16386		1.92818	±	0.167009		0.0218
Lung	39	1.10396	±	0.228021		0.947938	±	0.159375		0.0065
Pancreas	39	0.155452	±	0.0166418		0.157347	±	0.0184529		ns
Spleen	39	0.170724	±	0.0215695		0.16744	±	0.0239565		ns
C= Control, HT= Treated with hydroxytyrosol

## Sheet: ST4
Table S4. The fatty acid composition of longissimus dorsi at 180 days-old
		Neutral Lipids
	n	Groups								P-value
g/100 g total FA		C				HT				Tt	Tt*LS
C14:0	39	1.28552	±	0.110622		1.34339	±	0.0944913		0.0331	ns
C16:0	39	24.3674	±	1.41263		24.8876	±	1.32224		0.0452	0.0423
C16:1 n-9	39	0.25306	±	0.0678618		0.256079	±	0.0580044		ns	0.0337
C16:1 n-7	39	3.56409	±	0.47821		3.68551	±	0.548774		ns	ns
C17:0	39	0.319771	±	0.0801606		0.289719	±	0.0636296		ns	ns
C17:1	39	0.444327	±	0.129599		0.394716	±	0.117727		ns	ns
C18:0	39	12.3463	±	1.32177		12.2163	±	1.37341		ns	ns
C18:1 n-9	39	47.0848	±	1.59859		46.8	±	1.31628		ns	ns
C18:1 n-7	39	2.57597	±	0.34395		2.71274	±	0.510146		ns	ns
C18:2 n-6	39	5.48818	±	1.1354		5.10076	±	1.08954		0.0074	0.0057
C18:3 n-3	39	0.534907	±	0.102502		0.489563	±	0.0905581		0.0139	0.009
C20:0	39	0.189747	±	0.0140736		0.190877	±	0.0183547		ns	ns
C20:1 n-9	39	0.757615	±	0.0595293		0.783029	±	0.0812719		ns	ns
C20:2	39	0.303697	±	0.0394593		0.278509	±	0.0483846		0.0028	0.019
C20:3 n-6	39	0.07536	±	0.0175581		0.0710203	±	0.0158754		0.0437	ns
C20:4 n-6	39	0.21322	±	0.0450031		0.202837	±	0.0676512		ns	ns
C22:4 n-6	39	0.118541	±	0.143065		0.138732	±	0.144509		ns	ns
C22:5 n-3	39	0.0774294	±	0.0202437		0.158604	±	0.18401		0.0337	ns
SFA	39	38.5088	±	2.55176		38.9279	±	2.33671		ns	ns
MUFA	39	54.6799	±	1.84724		54.6321	±	1.90822		ns	ns
PUFA	39	6.81134	±	1.34868		6.44003	±	1.11696		0.0074	0.0026
Σn3	39	0.612336	±	0.108839		0.648168	±	0.153882		ns	0.0118
Σn6	39	5.89531	±	1.22158		5.51335	±	1.05727		0.0063	0.0058
Σn6/Σn3	39	9.63532	±	1.05232		8.87636	±	2.13545		0.0326	ns
IU	39	0.698086	±	0.0389091		0.692317	±	0.0298081		ns	0.0067
MUFA/SFA	39	1.42872	±	0.143027		1.41102	±	0.137042		ns	ns
C18:1/C18:0	39	4.08031	±	0.587629		4.11631	±	0.610757		ns	ns
		Polar Lipids
	n	Groups								P-value
		C				HTX				Tt	Tt*LS
C14:0	39	1.96318	±	0.401215		2.2256	±	0.34283		ns	ns
C16:0	39	21.7061	±	0.627742		21.4401	±	1.01184		ns	0.039
C16:1 n-9	39	0.888569	±	0.193913		0.929549	±	0.182272		ns	ns
C16:1 n-7	39	0.822925	±	0.166165		0.811654	±	0.129867		ns	ns
C17:0	39	0.767535	±	0.196146		0.707453	±	0.185731		ns	ns
C17:1	39	1.90712	±	0.53196		1.90821	±	0.385646		ns	ns
C18:0	39	10.1258	±	0.814304		10.1545	±	0.990094		ns	0.038
C18:1 n-9	39	10.6506	±	1.48796		10.2579	±	1.75693		ns	ns
C18:1 n-7	39	2.87541	±	0.2541		3.19425	±	0.415655		0.0399	ns
C18:2 n-6	39	29.2924	±	1.10786		28.5335	±	1.3653		0.048	0.0092
C18:3 n-3	39	0.751367	±	0.147688		0.669874	±	0.123394		ns	ns
C20:0	39	0.152615	±	0.0275812		0.150247	±	0.0346588		ns	ns
C20:1 n-9	39	0.224649	±	0.0385358		0.232279	±	0.0356763		ns	ns
C20:2		0.567071	±	0.0581389		0.573938	±	0.0406642		ns	ns
C20:3 n-6	39	0.924665	±	0.110993		0.955683	±	0.112313		ns	ns
C20:4 n-6	39	11.5999	±	1.71959		12.2843	±	1.67737		ns	0.011
C20:5 n-3	39	0.747568	±	0.0976952		0.747291	±	0.071556		ns	0.0217
C22:4 n-6	39	1.51761	±	0.201442		1.44015	±	0.258557		ns	ns
C22:5 n-6	39	0.175528	±	0.0379917		0.187671	±	0.0345359		ns	ns
C22:5 n-3		1.66122	±	0.18941		1.66162	±	0.133112		ns	0.0015
C22:6 n-3	39	0.678112	±	0.241351		0.934217	±	0.261563		0.0497	ns
SFA	39	34.7152	±	0.72633		34.6779	±	0.608951		ns	ns
MUFA	39	17.3693	±	1.70054		17.3338	±	1.86152		ns	ns
PUFA	39	47.9155	±	1.54192		47.9883	±	1.59403		ns	ns
Σn3	39	3.83827	±	0.360683		4.013	±	0.278303		ns	0.0011
Σn6	39	43.5101	±	1.25878		43.4013	±	1.46191		ns	ns
Σn6/Σn3	39	11.41	±	0.858133		10.8527	±	0.660636		0.0192	0.0002
IU	39	1.51577	±	0.0601009		1.53912	±	0.0528936		ns	0.016
MUFA/SFA	39	0.500939	±	0.0534625		0.500524	±	0.0600758		ns	ns
C18:1/C18:0	39	1.35	±	0.225212		1.33758	±	0.215379		ns	ns
C= Control, HT= Treated with hydroxytyrosol, Tt=treatment, LS= litter size . FA= Fatty acids,
SFA = sum of saturated FA, MUFA = sum of monounsaturated FA, PUFA = sum of polyunsaturated FA,
UI = unsaturation index =1(monoenoics) + 2(dienoics) + 3(trienoics) + 4(tetraenoics) + 5(pentaenoics)
+ 6(hexaenoics). Ns= not significant.

## Sheet: ST5
Table S5. The fatty acid composition of gluteus medius at 180 days-old
		Neutral Lipids
	n	Groups								P-value
g/100 g total FA		C				HT				Tt	Tt*LS
C14:0	39	1.24504	±	0.094699		1.29958	±	0.0704885		ns	ns
C16:0	39	23.7365	±	0.992146		24.2602	±	0.884303		0.0028	ns
C16:1 n-9	39	0.314055	±	0.0974753		0.331304	±	0.0463375		ns	0.0022
C16:1 n-7	39	3.14783	±	0.461664		3.29391	±	0.383504		ns	ns
C17:0	39	0.402455	±	0.109131		0.380496	±	0.078359		ns	ns
C17:1	39	0.521	±	0.164272		0.476539	±	0.132787		ns	ns
C18:0	39	12.1149	±	1.09803		12.1634	±	1.1816		ns	ns
C18:1 n-9	39	45.9508	±	1.94046		44.9904	±	1.73833		ns	ns
C18:1 n-7	39	2.37115	±	0.45992		2.60698	±	0.410049		ns	ns
C18:2 n-6	39	7.48336	±	1.79644		7.35317	±	1.0579		0.0242	0.0192
C18:3 n-3	39	0.701439	±	0.130439		0.657721	±	0.0780318		0.0343	0.011
C20:0	39	0.166712	±	0.0116042		0.169569	±	0.0185801		ns	ns
C20:1 n-9	39	0.777607	±	0.0590397		0.781137	±	0.0911323		ns	ns
C20:2	39	0.381418	±	0.066437		0.367528	±	0.029286		0.0052	ns
C20:3 n-6	39	0.101757	±	0.0307615		0.105371	±	0.029014		ns	ns
C20:4 n-6	39	0.36248	±	0.209678		0.437068	±	0.272413		ns	ns
C22:4 n-6	39	0.113711	±	0.0497027		0.191428	±	0.210876		ns	ns
C22:5 n-3	39	0.107871	±	0.0303648		0.134245	±	0.113329		ns	ns
SFA	39	37.6656	±	1.81398		38.2732	±	1.88899		ns	ns
MUFA	39	53.0824	±	2.12646		52.4803	±	1.89385		ns	ns
PUFA	39	9.25203	±	2.16451		9.24653	±	1.47827		ns	0.0264
Σn3	39	0.80931	±	0.147729		0.791966	±	0.161707		ns	ns
Σn6	39	8.0613	±	1.97333		8.08703	±	1.36944		ns	0.0276
Σn6/Σn3	39	9.91194	±	1.20554		10.3535	±	1.39973		ns	ns
IU	39	0.736657	±	0.0382645		0.733962	±	0.0353822		ns	ns
MUFA/SFA	39	1.41338	±	0.103512		1.37619	±	0.113635		ns	ns
C18:1/C18:0	39	4.02524	±	0.452346		3.95884	±	0.519341		ns	ns
		Polar Lipids
	n	Groups								P-value
		C				HT				Tt	Tt*LS
C14:0	39	2.16825	±	0.435298		2.37614	±	0.463526		ns	0.0206
C16:0	39	22.4668	±	0.527391		22.1443	±	0.692437		ns	ns
C16:1 n-9	39	1.02927	±	0.216286		0.993253	±	0.197309		ns	ns
C16:1 n-7	39	0.782001	±	0.128066		0.729074	±	0.0730027		ns	ns
C17:0	39	0.838644	±	0.256393		0.66781	±	0.150356		ns	ns
C17:1	39	1.51679	±	0.634653		1.54245	±	0.539125		ns	ns
C18:0	39	10.4067	±	0.879624		10.5875	±	1.13791		ns	ns
C18:1 n-9	39	9.60209	±	1.95023		8.44332	±	1.2443		ns	0.0216
C18:1 n-7	39	2.63702	±	0.291769		2.99058	±	0.34815		0.0061	ns
C18:2 n-6	39	29.7619	±	1.24106		29.134	±	1.15805		ns	ns
C18:3 n-3	39	0.735132	±	0.158327		0.62181	±	0.059811		ns	ns
C20:0	39	0.143964	±	0.0286934		0.137646	±	0.0249502		ns	ns
C20:1 n-9	39	0.208641	±	0.0291067		0.19579	±	0.0271691		ns	ns
C20:2	39	0.53898	±	0.0525679		0.521019	±	0.0530842		ns	0.0438
C20:3 n-6	39	0.843684	±	0.110978		0.907875	±	0.10096		ns	0.0271
C20:4 n-6	39	11.8144	±	1.67647		13.2157	±	1.41637		ns	0.0179
C20:5 n-3	39	0.735854	±	0.125353		0.731913	±	0.0888815		ns	ns
C22:4 n-6	39	1.39304	±	0.184117		1.32749	±	0.236417		ns	ns
C22:5 n-6	39	0.098714	±	0.0515872		0.118372	±	0.0663846		ns	ns
C22:5 n-3	39	1.57872	±	0.119584		1.66858	±	0.123183		0.0324	ns
C22:6 n-3	39	0.699492	±	0.26775		0.945342	±	0.258343		ns	ns
SFA	39	36.0244	±	0.973676		35.9135	±	0.942543		ns	ns
MUFA	39	15.7758	±	2.02099		14.8945	±	1.38676		ns	0.0105
PUFA	39	48.1998	±	1.48086		49.192	±	0.927156		ns	0.0309
Σn3	39	3.7492	±	0.269554		3.96765	±	0.317595		ns	ns
Σn6	39	43.9117	±	1.32683		44.7034	±	0.771693		ns	0.0397
Σn6/Σn3	39	11.7574	±	0.727153		11.3283	±	0.834124		ns	ns
IU	39	1.50207	±	0.0525099		1.55233	±	0.0392343		0.0281	ns
MUFA/SFA	39	0.439257	±	0.0651011		0.415735	±	0.0483787		ns	0.0157
C18:1/C18:0	39	1.18922	±	0.229564		1.09916	±	0.21289		ns	ns
C= Control, HT= Treated with hydroxytyrosol, Tt=treatment, LS= litter size . FA= Fatty acids,
SFA = sum of saturated FA, MUFA = sum of monounsaturated FA, PUFA = sum of polyunsaturated FA,
UI = unsaturation index =1(monoenoics) + 2(dienoics) + 3(trienoics) + 4(tetraenoics) + 5(pentaenoics)
+ 6(hexaenoics). Ns= not significant.

## Sheet: ST6
Table S6. The fatty acid composition of subcutaneous back fat at 180 days-old
		Outer layer
	n	Groups								P-value
g/100 g total FA		C				HT				Tt	Tt*LS
C14:0	39	1.11965	±	0.110811		1.16298	±	0.117464		0.0211	0.0288
C16:0	39	22.1279	±	1.46643		23.0018	±	1.73042		0.0186	0.0458
C16:1 n-9	39	0.381675	±	0.100769		0.354452	±	0.0902021		ns	ns
C16:1 n-7	39	1.83355	±	0.332453		1.82539	±	0.357656		ns	ns
C17:0	39	0.729802	±	0.242774		0.679421	±	0.230492		ns	ns
C17:1	39	0.759412	±	0.298799		0.660017	±	0.270213		ns	ns
C18:0	39	12.7643	±	1.84094		13.4243	±	1.45729		0.0395	ns
C18:1 n-9	39	43.335	±	1.66153		40.3888	±	7.42727		ns	ns
C18:1 n-7	39	1.84786	±	0.319439		3.24437	±	6.06476		ns	ns
C18:2 n-6	39	11.6831	±	1.66698		11.8057	±	1.42467		ns	ns
C18:3 n-3	39	1.0616	±	0.163844		1.01149	±	0.18029		ns	ns
C20:0	39	0.220272	±	0.0452828		0.244954	±	0.0441597		ns	ns
C20:1 n-9	39	1.17391	±	0.154997		1.22897	±	0.197182		ns	ns
C20:2	39	0.745712	±	0.079309		0.772685	±	0.0832589		ns	ns
C20:4 n-6	39	0.216173	±	0.0483209		0.19461	±	0.0380242		ns	ns
SFA	39	36.9619	±	3.11976		38.5135	±	2.71869		0.0069	0.0288
MUFA	39	49.3314	±	1.88183		47.702	±	2.46168		0.0078	ns
PUFA	39	14.96	±	1.97526		14.9971	±	1.85798		ns	0.0753
Σn3	39	1.0616	±	0.163844		1.01149	±	0.18029		ns	ns
Σn6	39	11.8993	±	1.70514		12.0003	±	1.44884		ns	0.0518
Σn6/Σn3	39	11.3226	±	1.4475		11.9864	±	0.899841		ns	ns
IU	39	0.782386	±	0.0496571		0.766717	±	0.0393981		0.0336	0.0194
MUFA/SFA	39	1.34736	±	0.161928		1.24794	±	0.145013		0.0037	ns
C18:1/C18:0	39	3.62678	±	0.651248		3.29368	±	0.470388		0.0075	ns
		Inner layer
	n	Groups								P-value
		C				HT				Tt	Tt*LS
C14:0	39	1.16045	±	0.146606		1.15457	±	0.101155		ns	ns
C16:0	39	20.9265	±	1.18323		21.1147	±	1.30273		ns	ns
C16:1 n-9	39	0.377395	±	0.0836855		0.334126	±	0.0860279		0.0102	ns
C16:1 n-7	39	2.2366	±	0.42788		2.0785	±	0.293839		ns	ns
C17:0	39	0.712288	±	0.219165		0.666359	±	0.222201		ns	ns
C17:1	39	0.888512	±	0.328749		0.763666	±	0.320155		ns	ns
C18:0	39	9.95742	±	1.07635		10.3141	±	1.24099		ns	ns
C18:1 n-9	39	43.473	±	6.86168		44.5797	±	1.19658		ns	ns
C18:1 n-7	39	3.67001	±	5.85788		2.19811	±	0.350087		ns	ns
C18:2 n-6	39	12.7941	±	1.61692		12.973	±	1.1936		ns	ns
C18:3 n-3	39	1.18054	±	0.128284		1.1386	±	0.179448		ns	ns
C20:0	39	0.205083	±	0.0280013		0.210644	±	0.0284111		ns	ns
C20:1 n-9	39	1.27684	±	0.194533		1.3089	±	0.145077		ns	ns
C20:2	39	0.88356	±	0.0842013		0.927811	±	0.0761361		ns	ns
C20:4 n-6	39	0.25765	±	0.0631424		0.237216	±	0.0458041		ns	ns
SFA	39	32.9617	±	1.99442		33.4604	±	2.33575		ns	ns
MUFA	39	51.9224	±	1.64091		51.263	±	1.5637		ns	ns
PUFA	39	16.5886	±	1.77806		16.5242	±	1.55196		ns	ns
Σn3	39	1.18054	±	0.128284		1.1386	±	0.179448		ns	ns
Σn6	39	13.0518	±	1.66473		13.2102	±	1.22173		ns	ns
Σn6/Σn3	39	11.1169	±	1.35165		11.7098	±	0.863048		ns	ns
IU	39	0.838499	±	0.0356045		0.834293	±	0.0372639		ns	0.0361
MUFA/SFA	39	1.5825	±	0.133572		1.54163	±	0.147183		ns	ns
C18:1/C18:0	39	4.79158	±	0.581927		4.60629	±	0.631523		ns	ns
C= Control, HT= Treated with hydroxytyrosol, Tt=treatment, LS= litter size . FA= Fatty acids,
SFA = sum of saturated FA, MUFA = sum of monounsaturated FA, PUFA = sum of polyunsaturated FA,
UI = unsaturation index =1(monoenoics) + 2(dienoics) + 3(trienoics) + 4(tetraenoics) + 5(pentaenoics)
+ 6(hexaenoics). Ns= not significant.

## Sheet: ST7
Table S7. The fatty acid composition of liver at 180 days-old
		Neutral Lipids
	n	Groups								P-value
g/100 g total FA		C				HT				Tt	Tt*LS
C14:0	39	0.31613	±	0.110511		0.266551	±	0.101653		ns	ns
C16:0	39	16.0349	±	1.68782		15.5266	±	1.69041		ns	ns
C16:1 n-9	39	0.395381	±	0.131745		0.313287	±	0.109711		ns	ns
C16:1 n-7	39	0.893956	±	0.221468		0.781537	±	0.225633		ns	ns
C17:0	39	2.01561	±	0.83882		1.70854	±	0.758487		ns	ns
C17:1	39	0.410074	±	0.224982		0.327359	±	0.120244		ns	ns
C18:0	39	32.5104	±	2.57068		36.1585	±	5.25336		ns	ns
C18:1 n-9	39	17.808	±	2.64489		13.8487	±	5.44862		ns	ns
C18:1 n-7	39	2.12755	±	0.556007		4.55117	±	5.72793		ns	ns
C18:2 n-6	39	11.3569	±	1.70442		10.3742	±	1.4646		ns	ns
C18:3 n-3	39	0.322956	±	0.203763		0.294735	±	0.153112		ns	ns
C20:0	39	0.509839	±	0.145509		0.530614	±	0.180322		ns	ns
C20:1 n-9	39	0.435993	±	0.0987114		0.479824	±	0.0577982		ns	ns
C20:2	39	0.516106	±	0.135266		0.436552	±	0.111495		0.0395	ns
C20:3 n-6	39	0.490234	±	0.315146		0.477611	±	0.293873		ns	0.0075
C20:4 n-6	39	9.93845	±	1.67024		9.87409	±	2.12368		ns	0.02
C20:5 n-3	39	0.41145	±	0.14003		0.326926	±	0.119198		ns	0.0254
C22:4 n-6	39	0.634511	±	0.198407		0.699304	±	0.366322		ns	ns
C22:5 n-6	39	0.122455	±	0.033712		0.138993	±	0.060189		ns	ns
C22:5 n-3	39	1.29573	±	0.327826		1.19119	±	0.393383		ns	ns
C22:6 n-3	39	1.02028	±	0.431146		1.23329	±	0.529255		ns	0.0104
C24:1 n-9	39	0.433107	±	0.109376		0.460387	±	0.0913843		ns	ns
SFA	39	51.3868	±	3.06739		54.1908	±	4.72579		ns	ns
MUFA	39	22.5041	±	3.32483		20.7623	±	3.24678		ns	ns
PUFA	39	26.1091	±	4.08448		25.0469	±	4.05923		ns	ns
Σn3	39	3.05042	±	0.749701		3.04614	±	0.765335		ns	0.004
Σn6	39	22.5426	±	3.39911		21.5642	±	3.3539		ns	ns
Σn6/Σn3	39	7.61606	±	1.18938		7.32199	±	1.23258		ns	0.0005
IU	39	1.06251	±	0.119023		1.0268	±	0.139574		ns	0.0477
MUFA/SFA	39	0.440029	±	0.0747131		0.388994	±	0.090417		ns	ns
C18:1/C18:0	39	0.620352	±	0.125203		0.529847	±	0.168822		ns	ns
		Polar Lipids
	n	Groups								P-value
		C				HT				Tt	Tt*LS
C14:0	39	0.281734	±	0.0632261		0.218586	±	0.0315094		ns	ns
C16:0	39	17.1905	±	1.82393		17.0019	±	1.61453		ns	ns
C16:1 n-9	39	0.401675	±	0.0787777		0.359348	±	0.0788135		ns	ns
C16:1 n-7	39	0.772567	±	0.225597		0.69578	±	0.117588		ns	ns
C17:0	39	2.04678	±	0.864241		1.66845	±	0.812528		ns	ns
C17:1	39	0.455039	±	0.264871		0.360884	±	0.162645		ns	ns
C18:0	39	31.3564	±	2.30437		33.6262	±	2.76966		ns	ns
C18:1 n-9	39	14.6574	±	1.78904		13.9712	±	1.25666		ns	ns
C18:1 n-7	39	1.64007	±	0.490977		1.45786	±	0.273048		ns	ns
C18:2 n-6	39	11.8576	±	1.45666		11.1835	±	1.18633		ns	ns
C18:3 n-3	39	0.25804	±	0.0769147		0.203928	±	0.0921868		ns	ns
C20:0	39	0.592099	±	0.125154		0.621451	±	0.118078		ns	ns
C20:1 n-9	39	0.3279	±	0.100594		0.317642	±	0.103573		ns	ns
C20:2	39	0.372992	±	0.106651		0.336075	±	0.0684057		ns	0.0381
C20:3 n-6	39	0.508754	±	0.311813		0.566864	±	0.317862		ns	0.0103
C20:4 n-6	39	12.2952	±	1.98004		12.32	±	2.09674		ns	0.003
C20:5 n-3	39	0.643352	±	0.190309		0.534944	±	0.150917		0.0366	0.0183
C22:4 n-6	39	0.628738	±	0.206857		0.559141	±	0.190445		ns	ns
C22:5 n-6	39	0.117392	±	0.035934		0.143465	±	0.0538602		ns	ns
C22:5 n-3	39	1.73831	±	0.340391		1.60348	±	0.510691		ns	ns
C22:6 n-3	39	1.40917	±	0.62573		1.72132	±	0.635738		ns	0.0018
C24:1 n-9	39	0.448334	±	0.0936831		0.527945	±	0.0813011		ns	ns
SFA	39	51.4675	±	1.59074		53.1366	±	2.48366		ns	ns
MUFA	39	18.703	±	2.5749		17.6907	±	1.55926		ns	ns
PUFA	39	29.8295	±	3.41497		29.1728	±	3.32683		ns	ns
Σn3	39	4.04886	±	0.87383		4.06367	±	0.791647		ns	0.0007
Σn6	39	25.4077	±	2.6886		24.773	±	2.66187		ns	ns
Σn6/Σn3	39	6.44758	±	0.946251		6.2442	±	0.912235		ns	<.0001
IU	39	1.18111	±	0.110499		1.16296	±	0.118221		ns	0.0204
MUFA/SFA	39	0.363265	±	0.0486236		0.333218	±	0.0284182		ns	ns
C18:1/C18:0	39	0.525435	±	0.100517		0.462041	±	0.0579968		ns	ns
C= Control, HT= Treated with hydroxytyrosol, Tt=treatment, LS= litter size . FA= Fatty acids,
SFA = sum of saturated FA, MUFA = sum of monounsaturated FA, PUFA = sum of polyunsaturated FA,
UI = unsaturation index =1(monoenoics) + 2(dienoics) + 3(trienoics) + 4(tetraenoics) + 5(pentaenoics)
+ 6(hexaenoics). Ns= not significant.

## Sheet: ST8
Table S8. The fatty acid composition of brain at 180 days-old
		Neutral Lipids
	n	Groups								P-value
g/100 g total FA		C				HT				Tt	Tt*LS
C14:0	39	0.513838	±	0.0819677		0.538262	±	0.0797933		ns	ns
C16:0	39	16.8597	±	1.57205		17.0583	±	1.22414		ns	0.0231
C16:1 n-9	39	0.858966	±	0.135775		0.879188	±	0.078664		ns	ns
C16:1 n-7	39	1.13885	±	0.112962		1.19648	±	0.13236		ns	ns
C17:0	39	0.303747	±	0.0330995		0.303894	±	0.0426795		ns	ns
C17:1	39	0.12407	±	0.0173794		0.128673	±	0.0244472		ns	ns
C18:0	39	23.6428	±	0.915341		23.1811	±	0.735537		ns	ns
C18:1 n-9	39	21.5926	±	4.08602		17.9474	±	8.42979		ns	ns
C18:1 n-7	39	5.32886	±	4.28479		9.21245	±	8.5015		ns	ns
C18:2 n-6	39	0.607076	±	0.0936496		0.630428	±	0.127791		ns	ns
C18:3 n-3	39	0.161931	±	0.0149826		0.159335	±	0.0273705		ns	ns
C20:0	39	0.385786	±	0.0708681		0.36695	±	0.0925842		ns	ns
C20:1 n-9	39	1.36294	±	0.171776		1.3184	±	0.449217		ns	ns
C20:2	39	0.644166	±	0.0829592		0.642099	±	0.0693978		ns	ns
C20:3 n-6	39	0.394867	±	0.0623562		0.393655	±	0.063585		ns	0.017
C20:4 n-6	39	9.41181	±	0.734718		9.50528	±	0.60283		ns	0.0458
C22:4 n-6	39	4.39307	±	0.297451		4.38029	±	0.349432		ns	ns
C22:5 n-6	39	1.55846	±	0.261024		1.4952	±	0.295018		ns	ns
C22:5 n-3	39	0.297478	±	0.0319022		0.303856	±	0.0366184		ns	ns
C22:6 n-3	39	8.50633	±	0.555191		8.49448	±	0.711619		ns	ns
C24:1 n-9	39	1.9126	±	0.424465		1.86428	±	0.403431		ns	ns
SFA	39	41.7059	±	1.19269		41.4485	±	1.19731		ns	ns
MUFA	39	32.3189	±	1.20869		32.5469	±	1.9872		ns	ns
PUFA	39	25.9752	±	1.58315		26.0046	±	1.41871		ns	ns
Σn3	39	8.96574	±	0.561644		8.95767	±	0.696361		ns	ns
Σn6	39	16.3653	±	1.09322		16.4049	±	1.02218		ns	ns
Σn6/Σn3	39	1.82698	±	0.0925632		1.83893	±	0.14942		ns	ns
IU	39	1.52029	±	0.0662086		1.52255	±	0.0534011		ns	ns
MUFA/SFA	39	0.775644	±	0.0390985		0.786862	±	0.0692917		ns	ns
C18:1/C18:0	39	1.1406	±	0.069108		1.17355	±	0.0818261		ns	ns
		Polar Lipids
	n	Groups								P-value
		C				HT				Tt	Tt*LS
C14:0	39	1.61472	±	0.112691		1.58715	±	0.147563		ns	0.0141
C16:0	39	25.2576	±	0.996317		25.0579	±	1.01575		ns	ns
C16:1 n-9	39	1.91013	±	0.198908		1.82821	±	0.254116		ns	ns
C16:1 n-7	39	2.33847	±	0.235612		2.36319	±	0.327345		ns	0.0104
C17:0	39	0.357639	±	0.0475626		0.367888	±	0.0416079		0.0333	ns
C17:1	39	0.738248	±	0.384508		0.984948	±	0.247021		0.0131	0.0212
C18:0	39	15.3431	±	1.04064		15.2113	±	1.02875		ns	0.0272
C18:1 n-9	39	19.8948	±	0.907776		20.1243	±	1.21611		ns	ns
C18:1 n-7	39	4.16427	±	0.295556		4.42968	±	0.394183		ns	ns
C18:2 n-6	39	0.436092	±	0.0855116		0.447866	±	0.0728864		ns	0.0443
C18:3 n-3	39	0.174302	±	0.0399676		0.188892	±	0.038978		ns	ns
C20:0	39	0.367855	±	0.0994787		0.35017	±	0.0895635		ns	ns
C20:1 n-9	39	1.34543	±	0.148385		1.34747	±	0.455938		ns	ns
C20:2		0.622201	±	0.0657865		0.616422	±	0.0692626		ns	ns
C20:3 n-6	39	0.336742	±	0.0300448		0.328131	±	0.0317443		0.0276	ns
C20:4 n-6	39	9.51951	±	0.536537		9.46719	±	0.611694		ns	ns
C22:4 n-6	39	4.67898	±	0.179102		4.58105	±	0.275656		ns	ns
C22:5 n-6	39	1.36738	±	0.207464		1.28718	±	0.272647		ns	ns
C22:5 n-3	39	0.30533	±	0.0298886		0.312304	±	0.046477		ns	0.0496
C22:6 n-3		8.22407	±	0.539717		8.05459	±	0.58341		ns	ns
C24:1 n-9	39	1.00304	±	0.440679		1.06422	±	0.549891		ns	ns
SFA	39	42.941	±	1.02016		42.5744	±	1.13301		ns	ns
MUFA	39	31.3944	±	0.965992		32.142	±	1.77455		ns	ns
PUFA	39	25.6646	±	1.001		25.2836	±	1.01157		ns	ns
Σn3	39	8.7037	±	0.562064		8.55578	±	0.576502		ns	ns
Σn6	39	16.3387	±	0.671273		16.1114	±	0.916424		ns	ns
Σn6/Σn3	39	1.88331	±	0.124941		1.89271	±	0.184123		ns	ns
IU	39	1.49546	±	0.0456313		1.4834	±	0.0349234		ns	ns
MUFA/SFA	39	0.731753	±	0.0347629		0.756447	±	0.0637318		ns	ns
C18:1/C18:0	39	1.57285	±	0.091998		1.62099	±	0.140781		ns	ns
C= Control, HT= Treated with hydroxytyrosol, Tt=treatment, LS= litter size . FA= Fatty acids,
SFA = sum of saturated FA, MUFA = sum of monounsaturated FA, PUFA = sum of polyunsaturated FA,
UI = unsaturation index =1(monoenoics) + 2(dienoics) + 3(trienoics) + 4(tetraenoics) + 5(pentaenoics)
+ 6(hexaenoics). Ns= not significant.

## Sheet: ST9
Table S9. The fatty acid composition of longissimus dorsi at 25 days-old
		Neutral Lipids
	n	Groups								P-value
g/100 g total FA		C				HT				Tt	Tt*LS
C14:0	52	1.91223	±	0.160544		2.13413	±	0.27366		ns	ns
C16:0	52	27.1467	±	1.97199		27.2917	±	1.96343		ns	ns
C16:1 n-9	52	0.751578	±	0.12908		0.817406	±	0.178154		ns	ns
C16:1 n-7	52	5.9472	±	0.710065		6.19399	±	0.876897		ns	ns
C17:0	52	0.309181	±	0.0433519		0.305385	±	0.050553		ns	0.026
C17:1	52	0.483446	±	0.0681312		0.466204	±	0.0829646		ns	0.0227
C18:0	52	6.04151	±	0.571633		5.59911	±	0.904131		0.035	ns
C18:1 n-9	52	40.6127	±	3.17962		38.5058	±	7.45633		ns	ns
C18:1 n-7	52	2.54781	±	0.235873		3.6944	±	6.21263		ns	ns
C18:2 n-6	52	10.9694	±	0.605091		11.7847	±	1.42987		ns	ns
C18:3 n-3	52	0.670372	±	0.0436393		0.717407	±	0.0833724		ns	0.003
C20:0	52	0.0997583	±	0.0307229		0.101302	±	0.0475454		ns	ns
C20:1 n-9	52	0.642754	±	0.137098		0.599773	±	0.0846821		ns	ns
C20:2	52	0.4615	±	0.0510804		0.45604	±	0.0557366		ns	ns
C20:3 n-6	52	0.142377	±	0.0354516		0.159538	±	0.0494253		ns	ns
C20:4 n-6	52	0.682626	±	0.335112		0.619911	±	0.798667		ns	ns
C22:4 n-6	52	0.195975	±	0.0734499		0.178642	±	0.070936		ns	ns
C22:5 n-6	52	0.0455488	±	0.0275921		0.0448117	±	0.0445914		ns	ns
C22:5 n-3	52	0.212466	±	0.0809226		0.206342	±	0.11415		ns	ns
C22:6 n-3	52	0.124792	±	0.0503429		0.123387	±	0.10493		ns	ns
SFA	52	35.5094	±	2.4346		35.4316	±	2.32255		ns	ns
MUFA	52	50.9855	±	2.98082		50.2776	±	3.90754		ns	ns
PUFA	52	13.505	±	0.946438		14.2908	±	2.47495		ns	ns
Σn3	52	1.00763	±	0.104229		1.04714	±	0.244902		ns	ns
Σn6	52	12.0359	±	0.872539		12.7876	±	2.2027		ns	ns
Σn6/Σn3	52	11.9971	±	0.751621		12.33	±	0.830537		ns	ns
IU	52	0.818388	±	0.0230645		0.825802	±	0.0477806		ns	ns
MUFA/SFA	52	1.44753	±	0.18354		1.43067	±	0.195606		ns	ns
C18:1/C18:0	52	7.22603	±	1.0404		7.73478	±	1.43873		0.0148	ns
		Polar Lipids
	n	Groups								P-value
		C				HT				Tt	Tt*LS
C14:0	52	1.69013	±	0.517654		1.81192	±	0.392984		ns	ns
C16:0	52	21.8928	±	0.721394		22.0335	±	0.744417		ns	ns
C16:1 n-9	52	0.85412	±	0.191567		0.907106	±	0.220436		ns	ns
C16:1 n-7	52	1.76944	±	0.373733		1.60095	±	0.219864		ns	ns
C17:0	52	0.385163	±	0.0391623		0.418104	±	0.0688703		0.007	ns
C17:1	52	1.03	±	0.448811		0.837698	±	0.487099		ns	ns
C18:0	52	12.013	±	0.694995		12.1733	±	0.753401		ns	ns
C18:1 n-9	52	13.6387	±	2.17091		12.8801	±	1.31645		ns	ns
C18:1 n-7	52	5.44099	±	0.353209		5.66288	±	0.315702		0.0393	ns
C18:2 n-6	52	19.3008	±	0.968892		19.7021	±	1.57134		ns	ns
C18:3 n-3	52	0.457266	±	0.0561789		0.454236	±	0.0695554		ns	0.0031
C20:0	52	0.130222	±	0.0639487		0.126138	±	0.067061		ns	ns
C20:1 n-9	52	0.315763	±	0.0496985		0.288667	±	0.0418926		ns	ns
C20:2	52	0.692178	±	0.0589896		0.690974	±	0.0542218		ns	ns
C20:3 n-6	52	0.774662	±	0.113818		0.804397	±	0.063166		ns	ns
C20:4 n-6	52	13.8822	±	1.60711		13.8648	±	1.2802		ns	ns
C20:5 n-3	52	0.411975	±	0.0444967		0.422073	±	0.0726339		ns	ns
C22:4 n-6	52	1.72679	±	0.168734		1.80449	±	0.165344		ns	ns
C22:5 n-6	52	0.56563	±	0.0835401		0.565621	±	0.0549132		ns	ns
C22:5 n-3	52	1.80988	±	0.228111		1.81212	±	0.241733		ns	ns
C22:6 n-3	52	1.2183	±	0.155453		1.1389	±	0.162969		ns	ns
SFA	52	36.1113	±	0.73804		36.5629	±	0.937544		ns	ns
MUFA	52	23.049	±	2.25321		22.1774	±	1.46441		ns	ns
PUFA	52	40.8397	±	1.99007		41.2597	±	1.43614		ns	ns
Σn3	52	3.89742	±	0.27697		3.82733	±	0.318822		ns	ns
Σn6	52	36.2501	±	1.89445		36.7414	±	1.38081		ns	ns
Σn6/Σn3	52	9.33283	±	0.656845		9.66199	±	0.86075		ns	ns
IU	52	1.50414	±	0.0548764		1.50249	±	0.0440572		ns	ns
MUFA/SFA	52	0.639131	±	0.0701841		0.607285	±	0.0473242		ns	ns
C18:1/C18:0	52	1.58991	±	0.164429		1.52918	±	0.149086		ns	ns
C= Control, HT= Treated with hydroxytyrosol, Tt=treatment, LS= litter size . FA= Fatty acids,
SFA = sum of saturated FA, MUFA = sum of monounsaturated FA, PUFA = sum of polyunsaturated FA,
UI = unsaturation index =1(monoenoics) + 2(dienoics) + 3(trienoics) + 4(tetraenoics) + 5(pentaenoics)
+ 6(hexaenoics). Ns= not significant.

## Sheet: ST10
Table S10. The fatty acid composition of gluteus medius at 25 days-old
		Neutral Lipids
	n	Groups								P-value
g/100 g total FA		C				HT				Tt	Tt*LS
C14:0	52	2.02803		0.189945		2.39758		0.349676		0.0071	ns
C16:0	52	28.617		2.64365		29.7688		2.34258		ns	ns
C16:1 n-9	52	0.821013		0.112563		0.991222		0.195427		0.0473	ns
C16:1 n-7	52	5.90004		0.704355		6.10215		0.828916		ns	ns
C17:0	52	0.309664		0.0464171		0.31572		0.0609567		ns	0.0167
C17:1	52	0.475363		0.0736291		0.443858		0.0763796		ns	0.001
C18:0	52	5.77029		0.542761		5.23728		0.655608		0.0047	ns
C18:1 n-9	52	39.0176		3.78719		36.4993		3.63046		ns	ns
C18:1 n-7	52	2.66203		0.318472		2.93861		0.28843		ns	ns
C18:2 n-6	52	10.8783		0.795254		11.7832		1.54303		ns	0.0404
C18:3 n-3	52	0.656188		0.0467362		0.715205		0.105155		ns	0.0047
C20:0	52	0.10773		0.0302361		0.118668		0.0319118		ns	ns
C20:1 n-9	52	0.660477		0.157479		0.641035		0.0883504		ns	ns
C20:2	52	0.476617		0.057488		0.489751		0.041624		ns	ns
C20:3 n-6	52	0.15368		0.0270149		0.170459		0.0325874		ns	ns
C20:4 n-6	52	0.752835		0.459063		0.5258		0.423054		0.0402	ns
C22:4 n-6	52	0.242434		0.0804188		0.302611		0.120482		ns	ns
C22:5 n-6	52	0.0577212		0.0269463		0.0649766		0.0338388		ns	ns
C22:5 n-3	52	0.254795		0.0755775		0.315789		0.119431		ns	ns
C22:6 n-3	52	0.158191		0.0590486		0.178001		0.0712557		ns	ns
SFA	52	36.8327		3.06787		37.8381		2.48852		ns	0.0487
MUFA	52	49.5365		3.63211		47.6162		3.45232		ns	ns
PUFA	52	13.6308		1.32702		14.5458		2.24209		ns	ns
Σn3	52	1.06917		0.122327		1.209		0.232189		ns	ns
Σn6	52	12.085		1.22286		12.847		2.00552		ns	ns
Σn6/Σn3	52	11.3392		0.719309		10.7144		0.888649		ns	ns
IU	52	0.811688		0.0339027		0.811045		0.0434502		ns	0.0126
MUFA/SFA	52	1.36044		0.202276		1.26815		0.164911		ns	ns
C18:1/C18:0	52	7.30767		1.11868		7.64315		1.15993		0.0341	ns
		Polar Lipids
	n	Groups								P-value
		C				HT				Tt	Tt*LS
C14:0	52	2.23502	±	0.349368		2.14569	±	0.319961		0.0012	ns
C16:0	52	22.6665	±	1.09655		22.1449	±	0.670681		0.025	0.011
C16:1 n-9	52	1.07809	±	0.133825		1.06376	±	0.152897		ns	ns
C16:1 n-7	52	1.55798	±	0.230925		1.48747	±	0.185358		ns	ns
C17:0	52	0.365424	±	0.0493328		0.371812	±	0.0569723		ns	0.0001
C17:1	52	0.261381	±	0.236036		0.219752	±	0.174955		ns	ns
C18:0	52	12.6451	±	1.20513		12.7618	±	0.8357		ns	ns
C18:1 n-9	52	11.666	±	1.50526		12.0332	±	1.13062		0.0009	ns
C18:1 n-7	52	5.00534	±	0.389017		4.94652	±	0.32442		ns	ns
C18:2 n-6	52	19.8095	±	0.85032		19.8529	±	1.56061		ns	ns
C18:3 n-3	52	0.401297	±	0.0385826		0.432842	±	0.0735808		ns	0.0013
C20:0	52	0.0978462	±	0.0555182		0.112856	±	0.0742027		0.0409	ns
C20:1 n-9	52	0.302616	±	0.0451908		0.287039	±	0.0384302		ns	ns
C20:2	52	0.656695	±	0.0670912		0.661045	±	0.0581933		ns	ns
C20:3 n-6	52	0.724501	±	0.0900348		0.748744	±	0.0615792		ns	ns
C20:4 n-6	52	14.6861	±	1.22118		14.7918	±	1.47755		ns	ns
C20:5 n-3	52	0.422889	±	0.0498293		0.414967	±	0.0549644		ns	ns
C22:4 n-6	52	1.72909	±	0.149129		1.7848	±	0.143309		ns	ns
C22:5 n-6	52	0.631524	±	0.0917754		0.646594	±	0.0545592		ns	ns
C22:5 n-3	52	1.82982	±	0.195764		1.85364	±	0.201374		ns	ns
C22:6 n-3	52	1.22734	±	0.204388		1.23793	±	0.167097		0.0469	ns
SFA	52	38.0099	±	0.499655		37.537	±	0.682079		0.0009	ns
MUFA	52	19.8714	±	1.72997		20.0377	±	1.29783		0.0146	ns
PUFA	52	42.1187	±	1.6366		42.4252	±	1.17015		ns	ns
Σn3	52	3.88135	±	0.321378		3.93938	±	0.293038		ns	ns
Σn6	52	37.5807	±	1.60445		37.8248	±	1.20368		ns	ns
Σn6/Σn3	52	9.74166	±	0.875928		9.65801	±	0.846243		ns	ns
IU	52	1.51627	±	0.0426352		1.5292	±	0.043478		ns	ns
MUFA/SFA	52	0.523065	±	0.0480458		0.534255	±	0.0397241		0.003	ns
C18:1/C18:0	52	1.32946	±	0.172913		1.33761	±	0.144359		ns	ns
C= Control, HT= Treated with hydroxytyrosol, Tt=treatment, LS= litter size . FA= Fatty acids,
SFA = sum of saturated FA, MUFA = sum of monounsaturated FA, PUFA = sum of polyunsaturated FA,
UI = unsaturation index =1(monoenoics) + 2(dienoics) + 3(trienoics) + 4(tetraenoics) + 5(pentaenoics)
+ 6(hexaenoics). Ns= not significant.

[truncated: 2 more sheets: ST11, ST12]
